# Supplementary material for: Conserved Function of Core Clock Proteins in the Gymnosperm Norway Spruce (Picea abies L. Karst)
Source: PubMed Central journal article supplement (PMC3610754; doi:10.1371/journal.pone.0060110), 2013-03-28

Supplemental figure S1

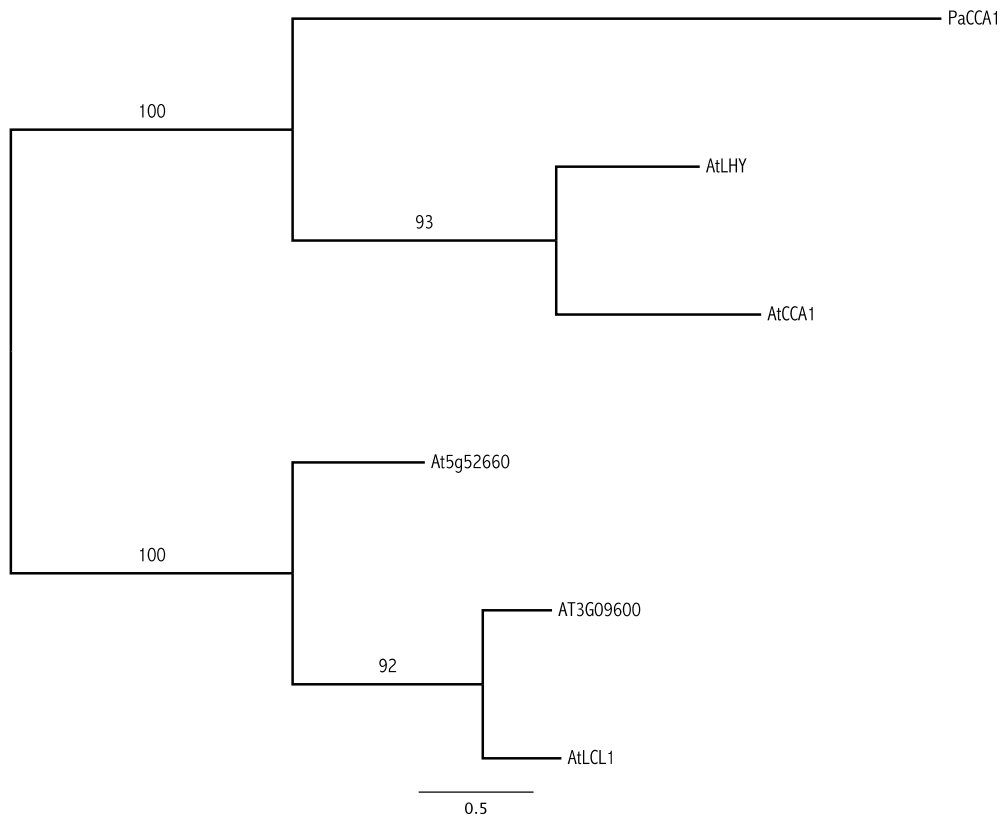

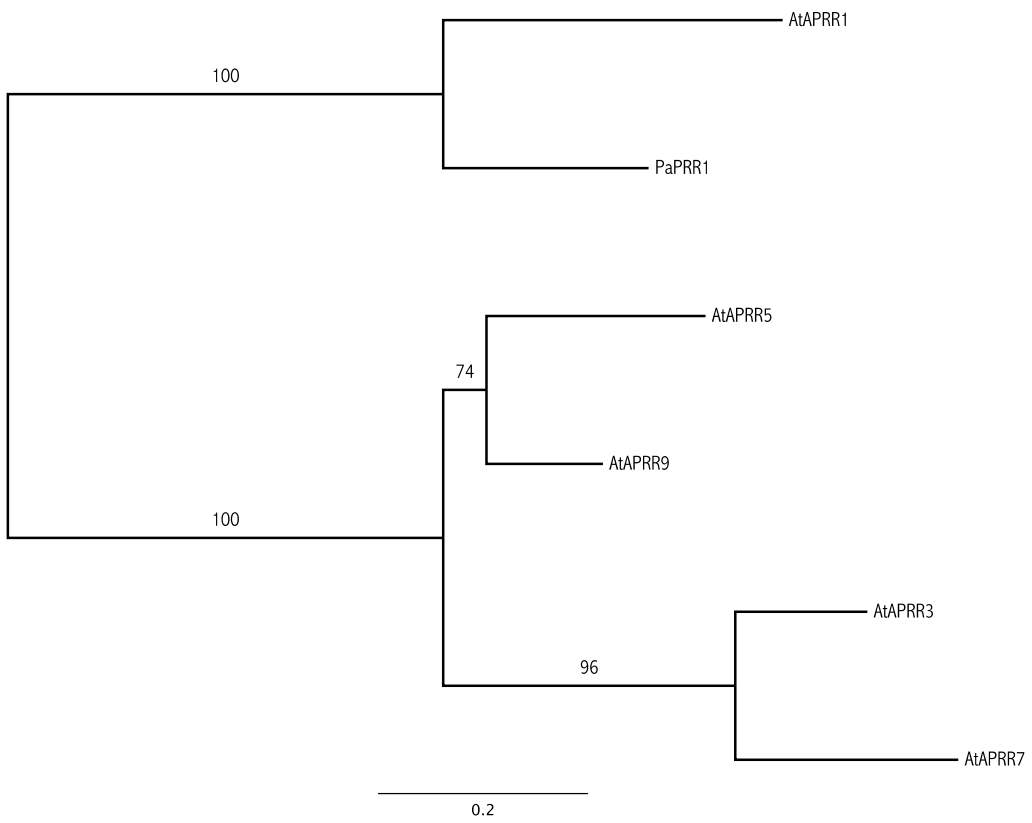

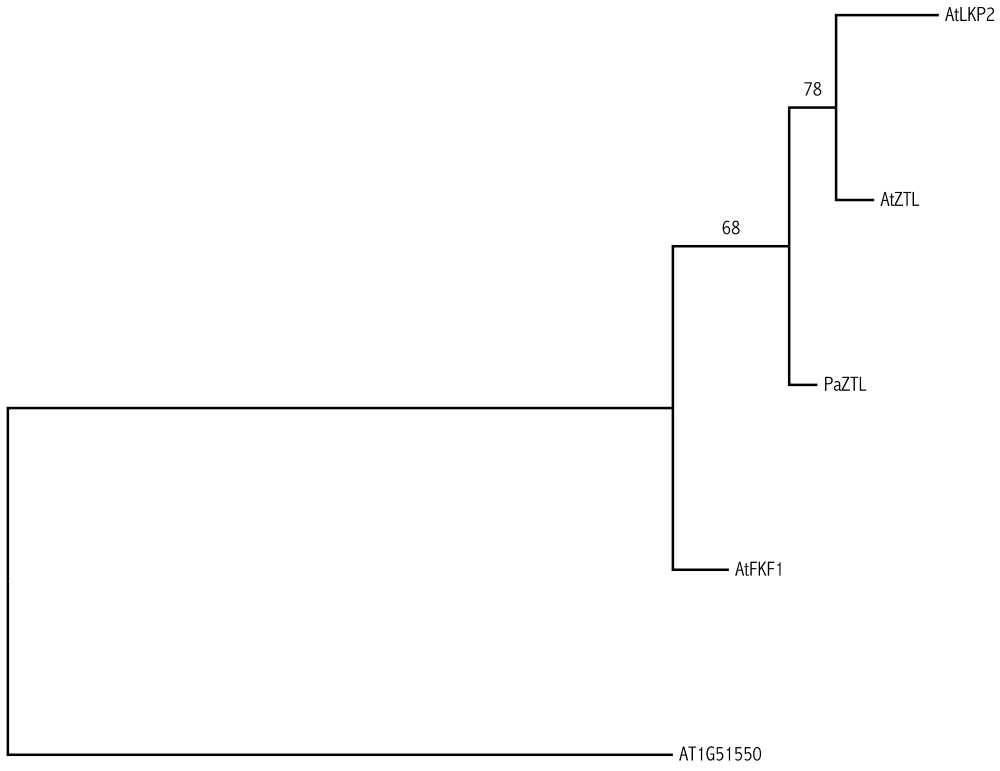

Supplement: pone.0060110.s001.pdf [file pone.0060110.s001.pdf]
